# Supplementary material
Source: PubMed Central journal article supplement (PMC5474940)
Supplement: NIHMS862946-supplement-SI.pdf [file NIHMS862946-supplement-SI.pdf]

— SUPPORTING INFORMATION —

**Exploring the Influence of Domain Architecture on the  
Catalytic Function of Diterpene Synthases**

Travis A. Pemberton,<sup>†,¶</sup> Mengbin Chen,<sup>†,¶</sup> Golda G. Harris,<sup>†</sup> Wayne K. W. Chou,<sup>‡</sup> Lian Duan,<sup>‡</sup>  
Mustafa Köksal,<sup>†</sup> Alexander Genshaft,<sup>†</sup> David E. Cane,<sup>‡</sup> and David W. Christianson<sup>†,\*</sup>

<sup>†</sup>Roy and Diana Vagelos Laboratories, Department of Chemistry, University of Pennsylvania,  
Philadelphia, Pennsylvania 19104-6323, United States

<sup>‡</sup>Department of Chemistry, Brown University, Box H, Providence, Rhode Island 02912,  
United States

\*To whom correspondence should be addressed: Roy and Diana Vagelos Laboratories,  
Department of Chemistry, University of Pennsylvania, 231 South 34<sup>th</sup> Street, Philadelphia,  
PA, 19104-6323. Tel: 215-898-5714; E-mail: [chris@sas.upenn.edu](mailto:chris@sas.upenn.edu)

<sup>¶</sup>Contributed equally to this work.

**Figure S2.** Mass spectra of diterpene products generated by TbTS mutants.

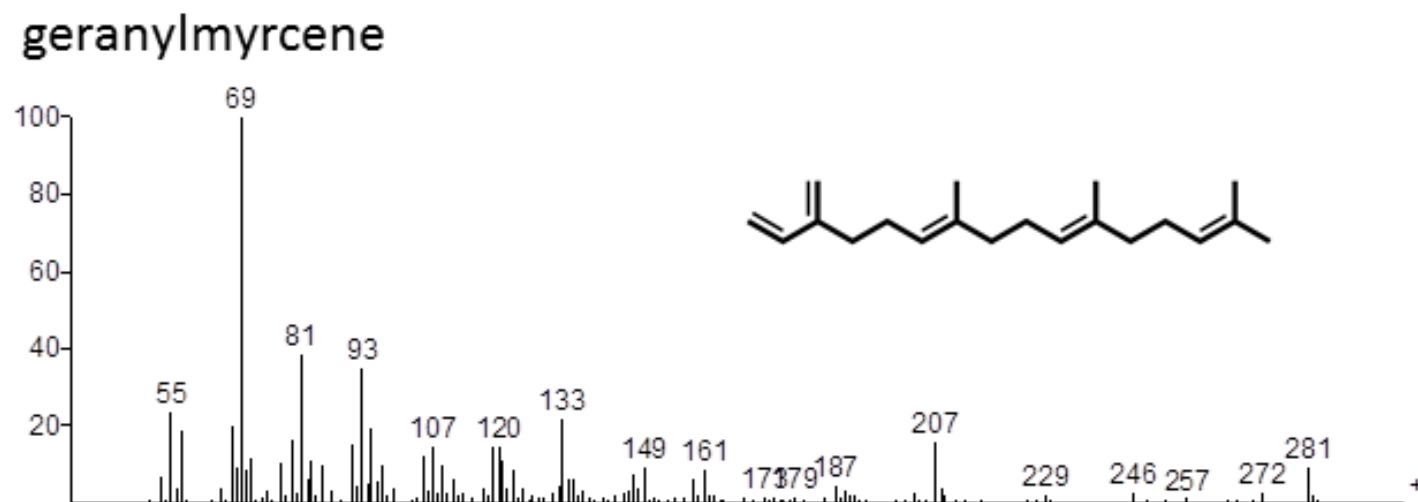

# Taxa-3(4),11(12)-diene

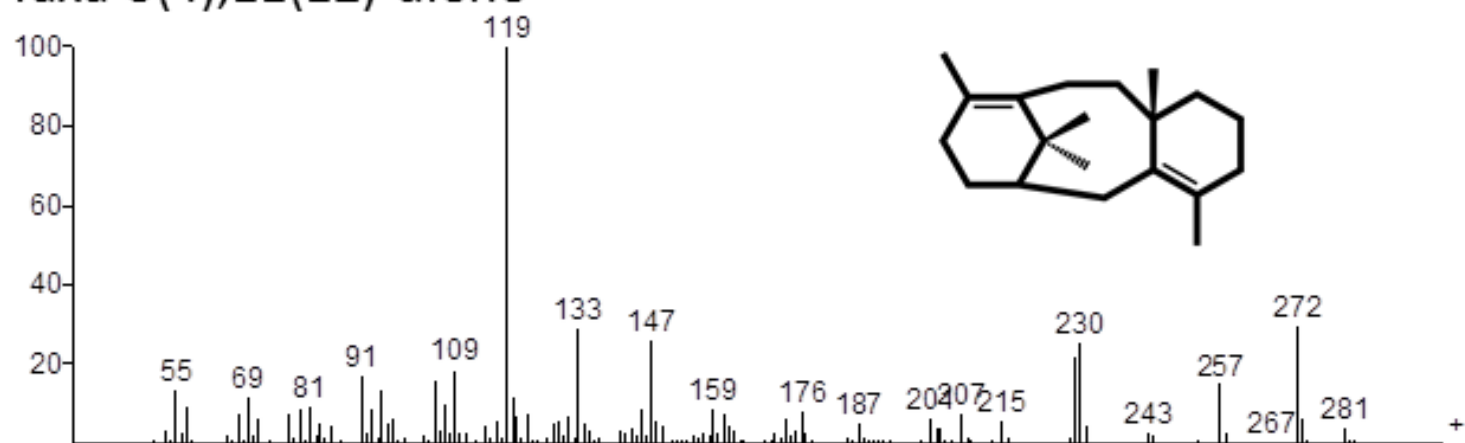

## Unknown diterpene 1

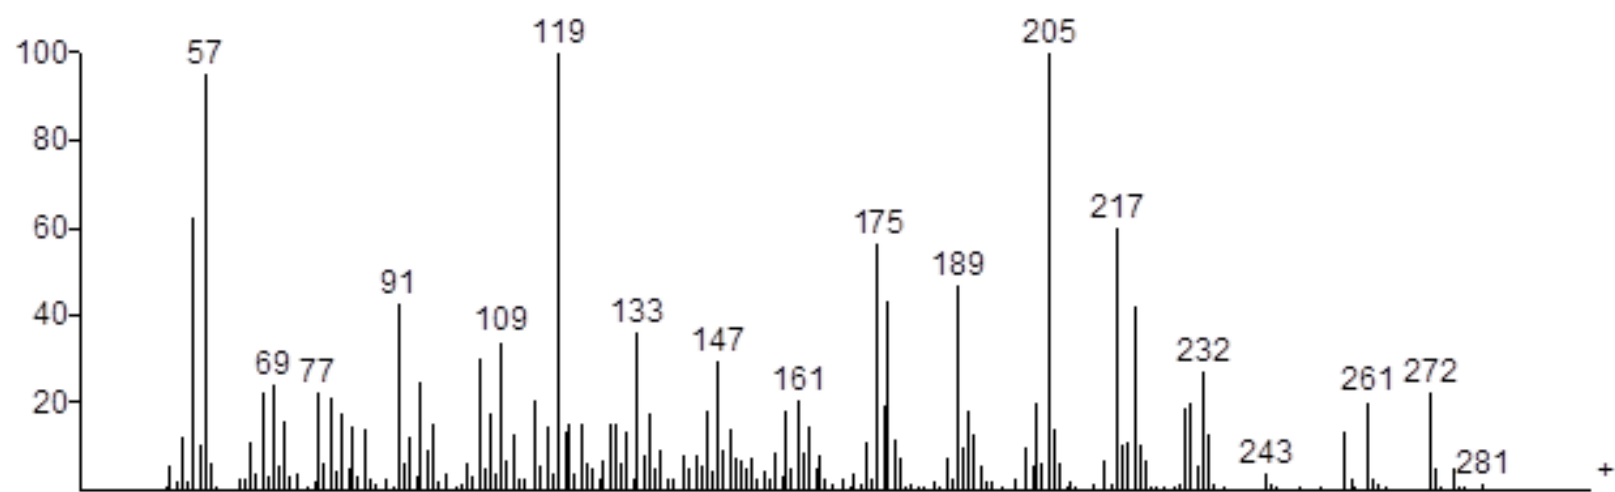

## Unknown diterpene 2

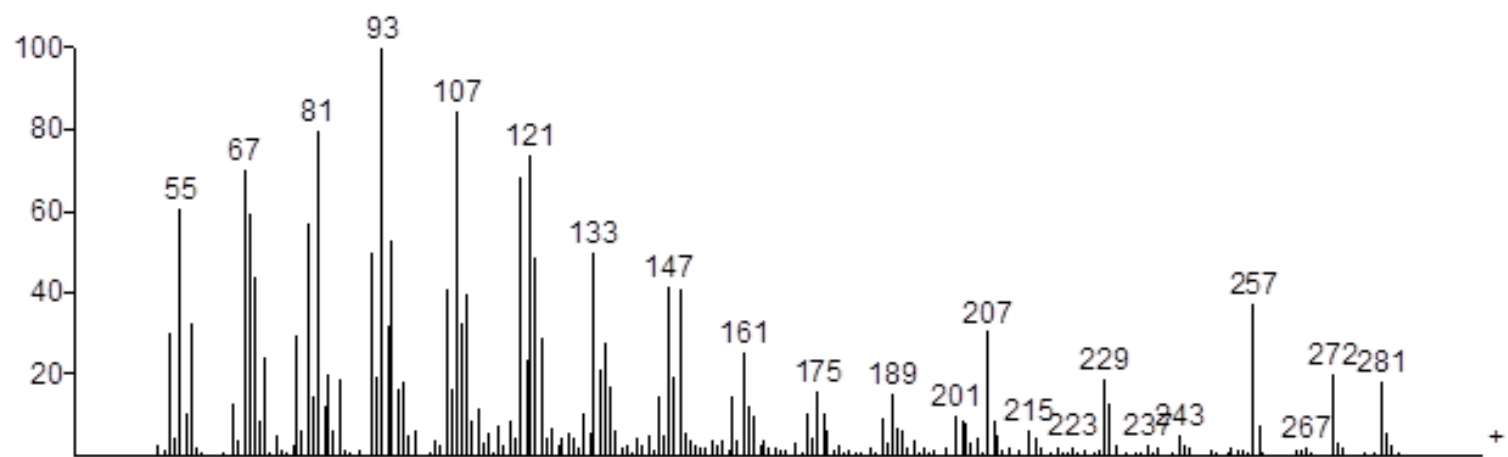

### Unknown diterpene 3

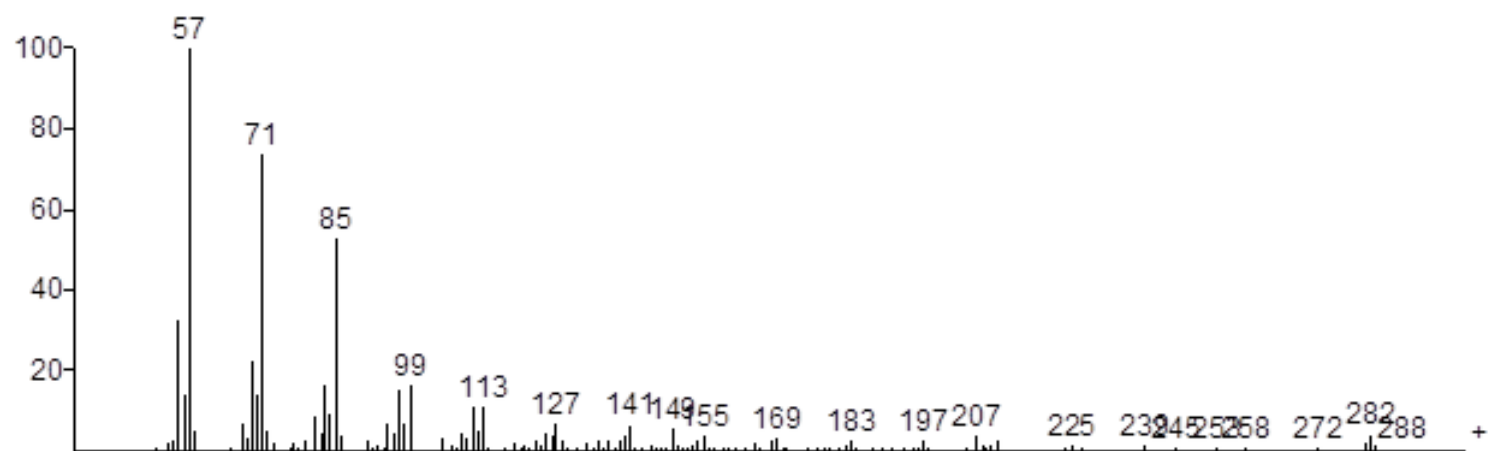

## Unknown diterpene 4

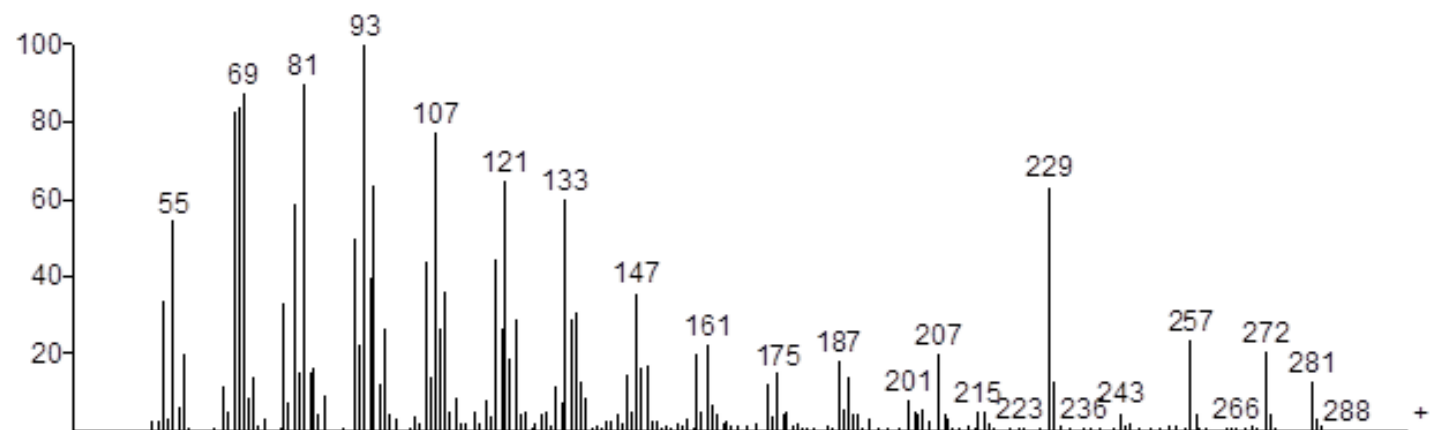

# taxa-4(20),11(12)-diene

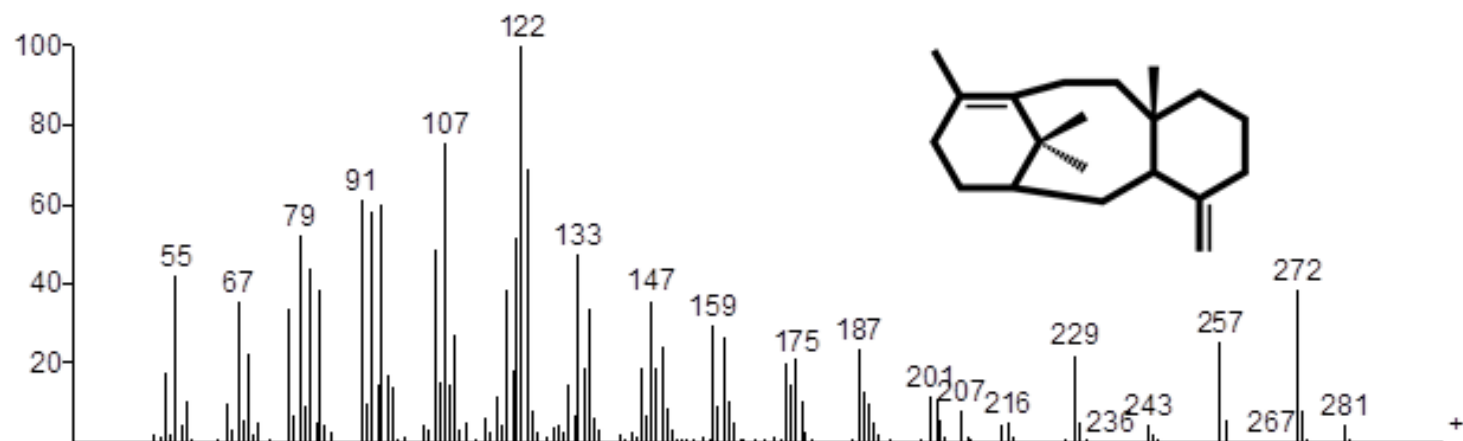



# geranylinalool

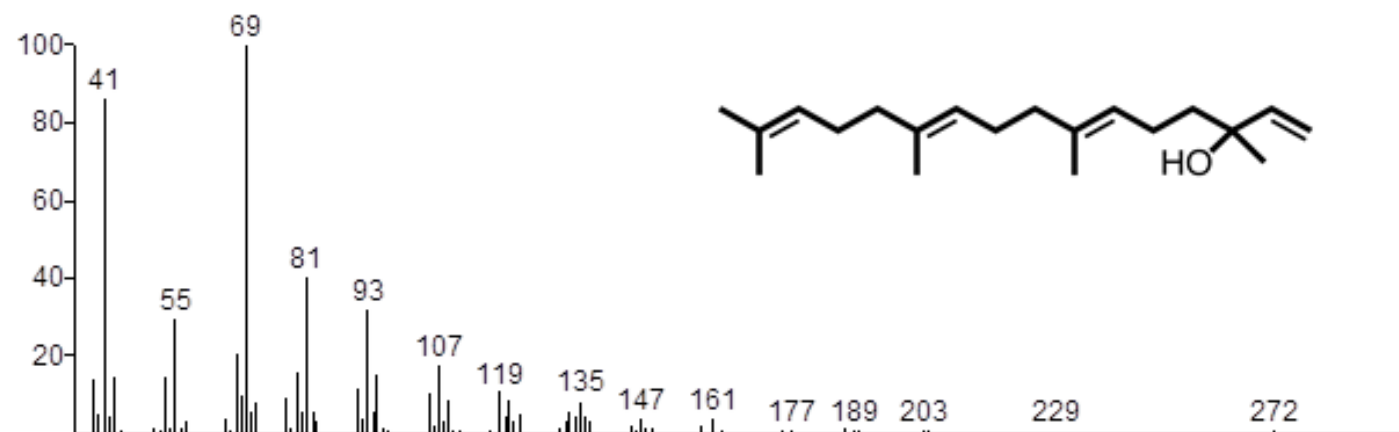

# taxadiene

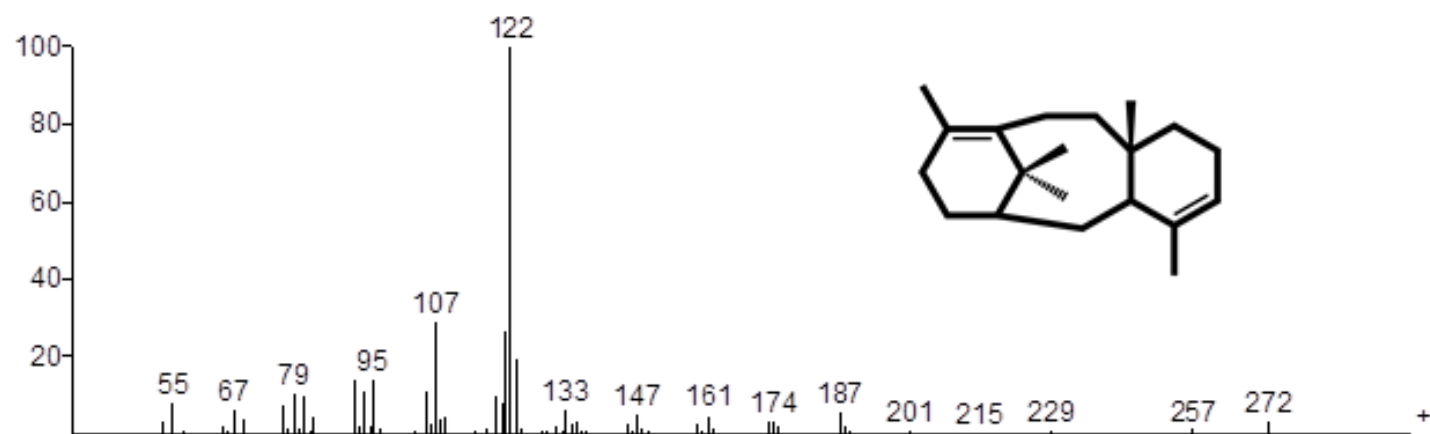

## Unknown diterpene 5

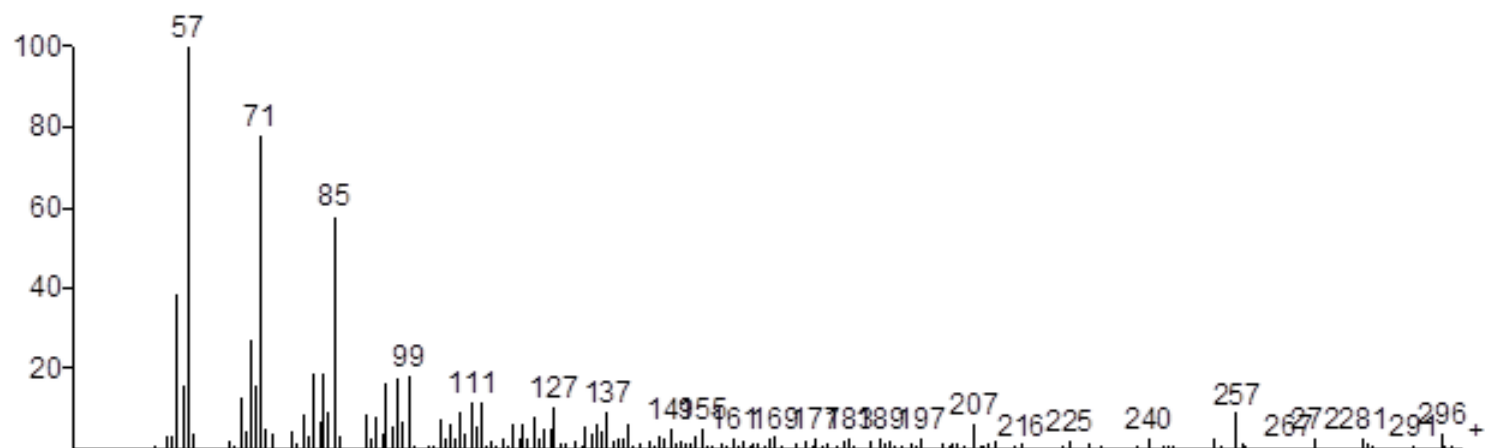

# geranylgeraniol

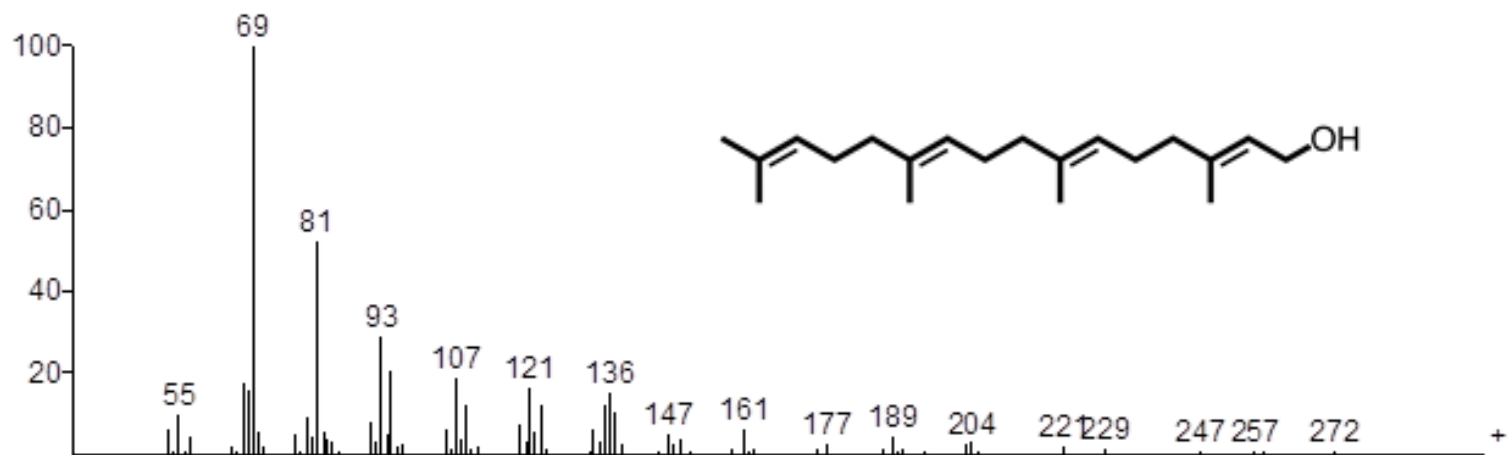

**Figure S3.** Mass spectra of sesquiterpene, diterpene, and sesterterpene products generated by PaFS and AcOS chimeras.

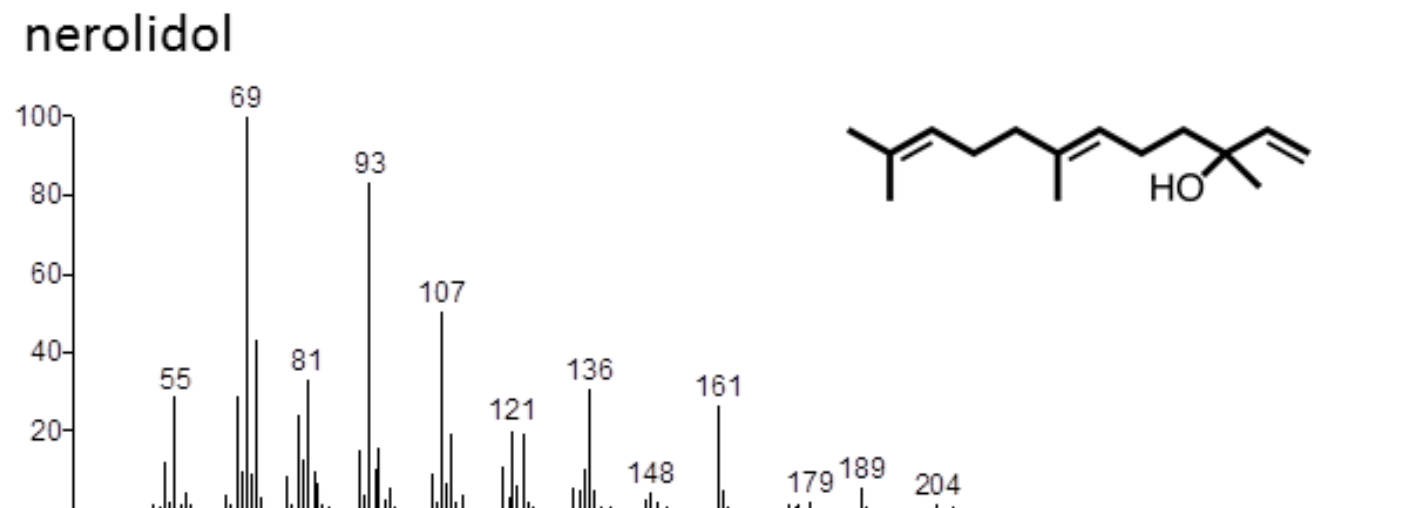

# farnesol

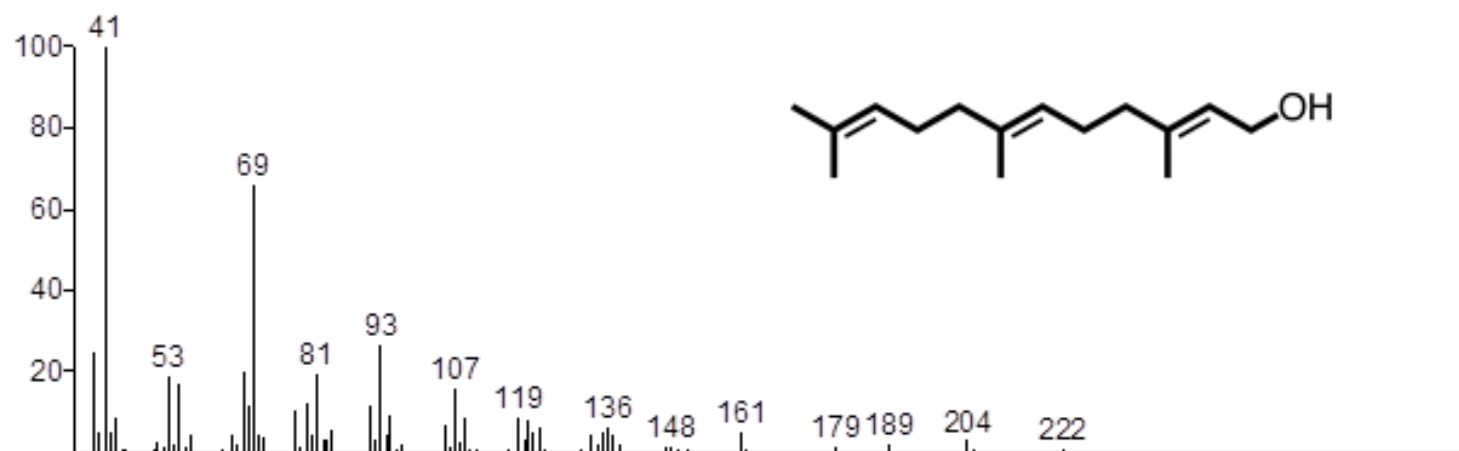

# fusicocadiene

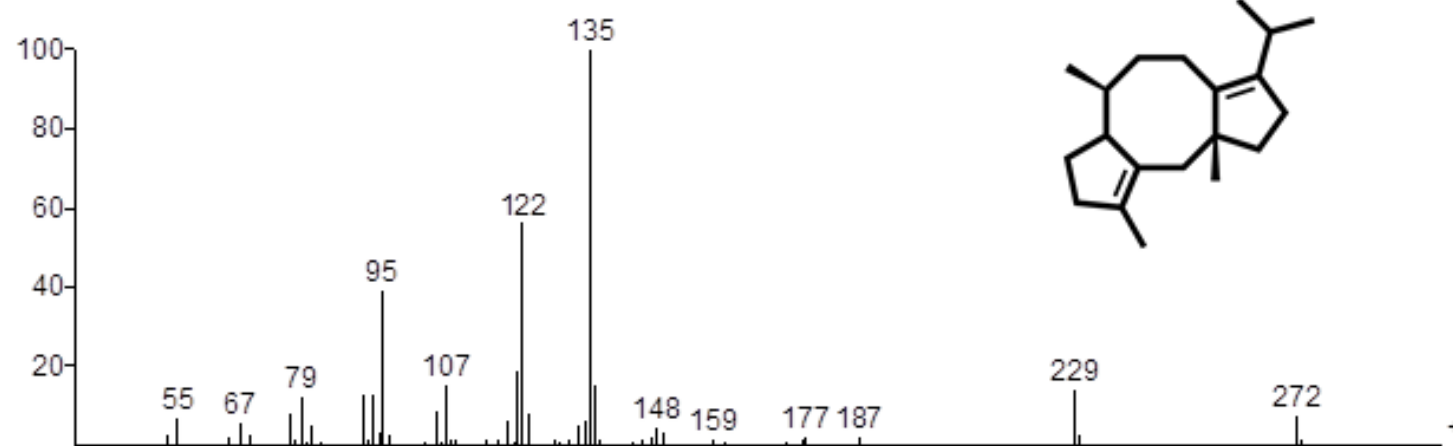

# Unknown diterpene 6

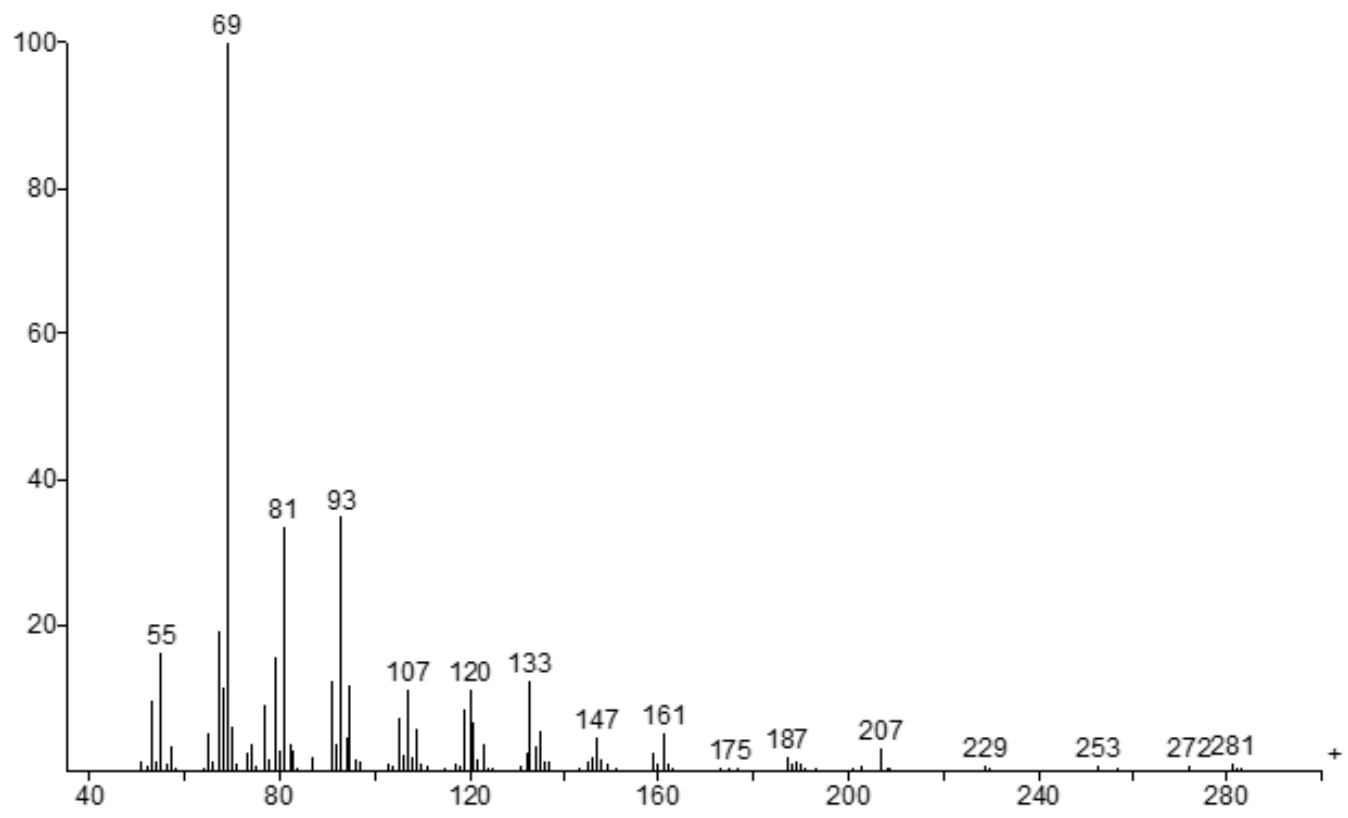



# Unknown diterpene 7

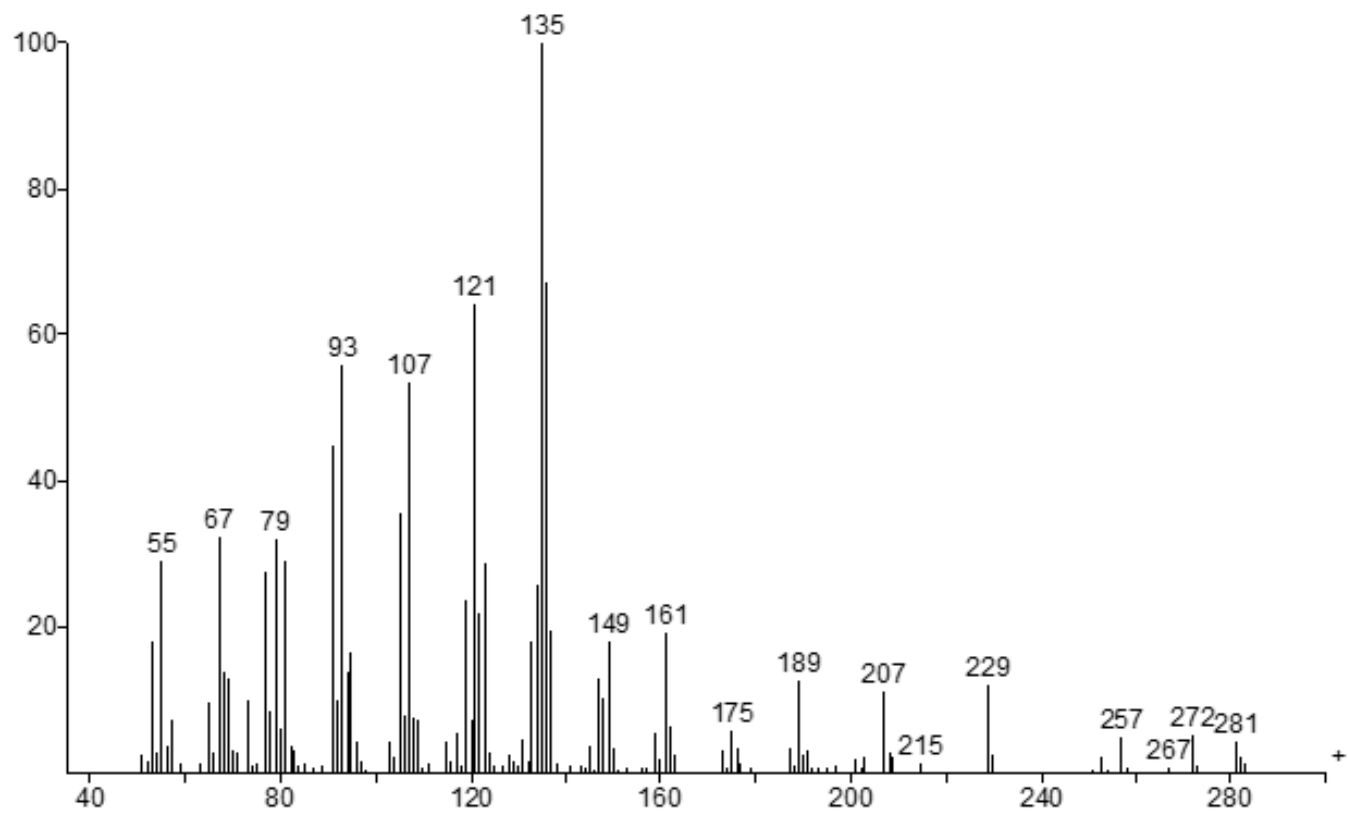

# Unknown diterpene 8

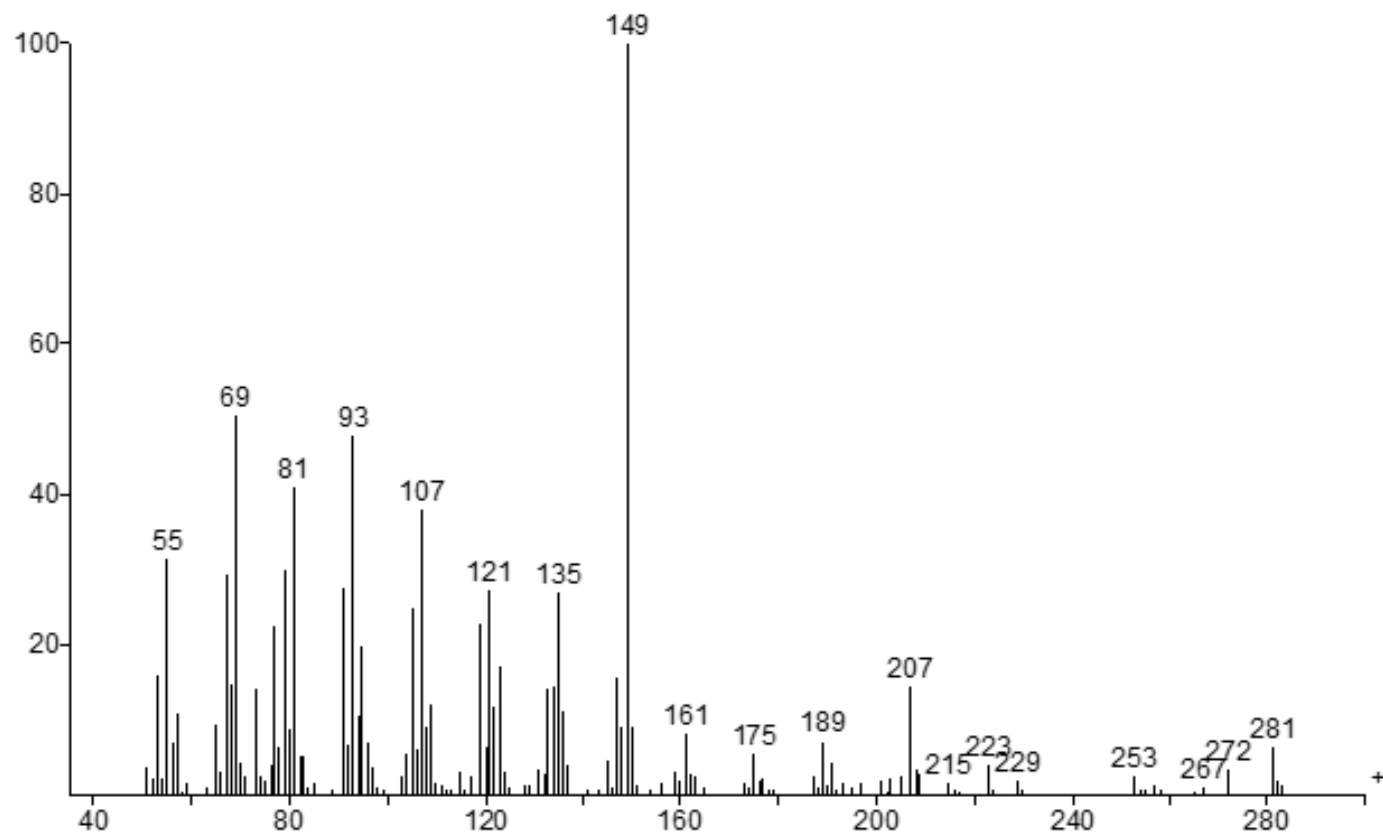

# cembrene A

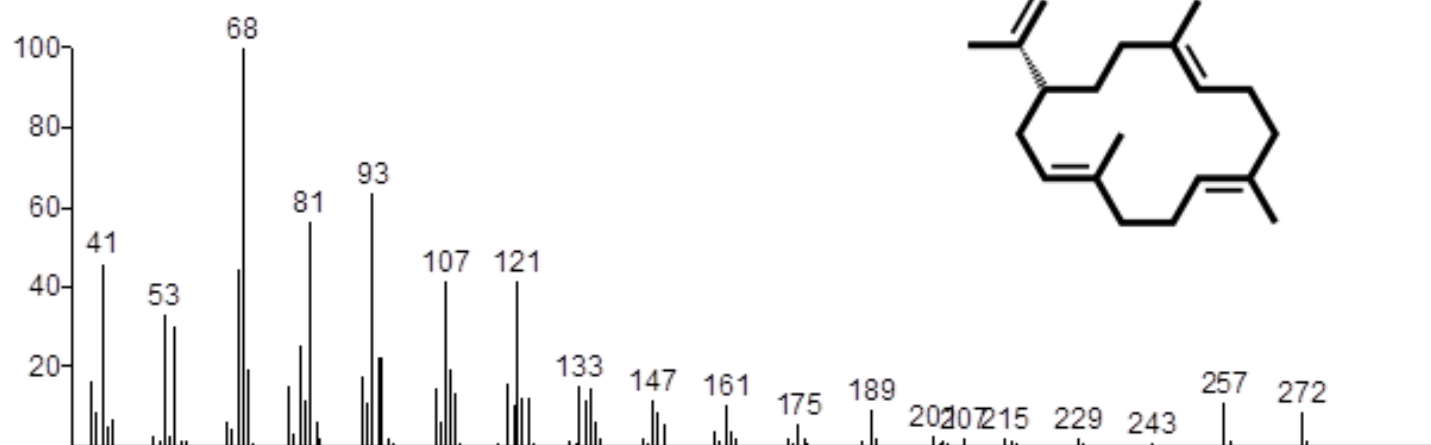

# geranylinalool

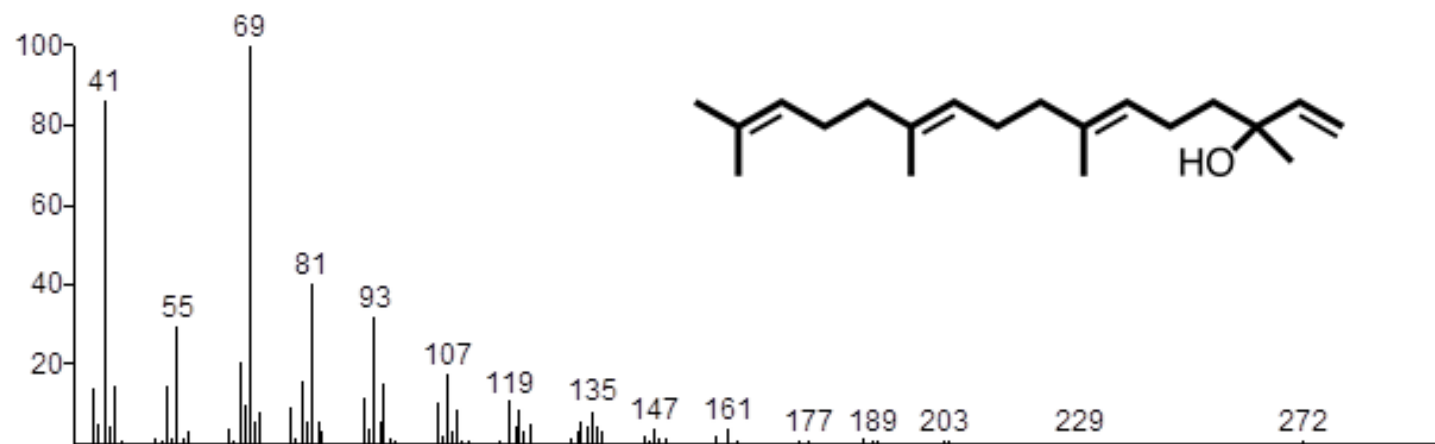

# Unknown diterpene 9

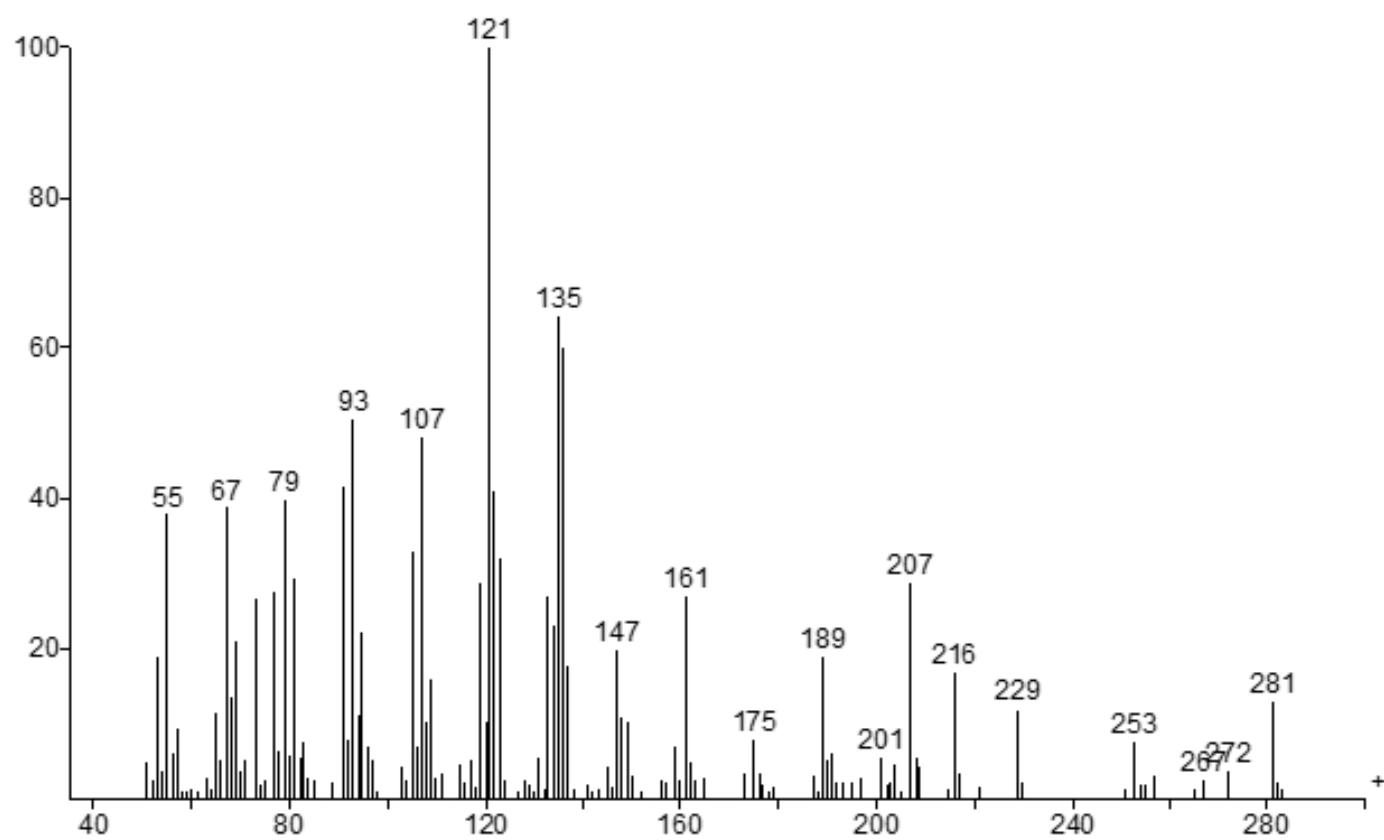

## Unknown diterpene 10

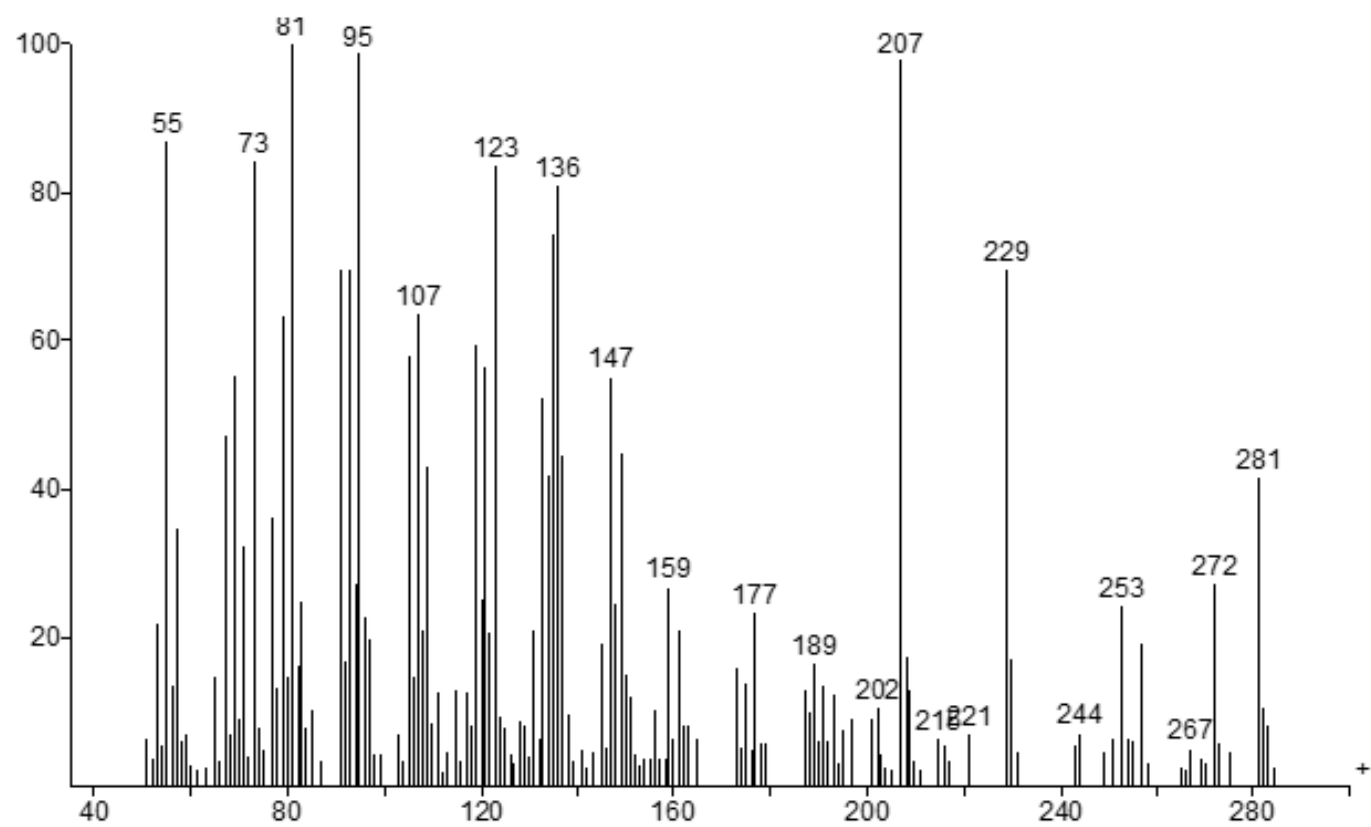

# Unknown diterpene 11

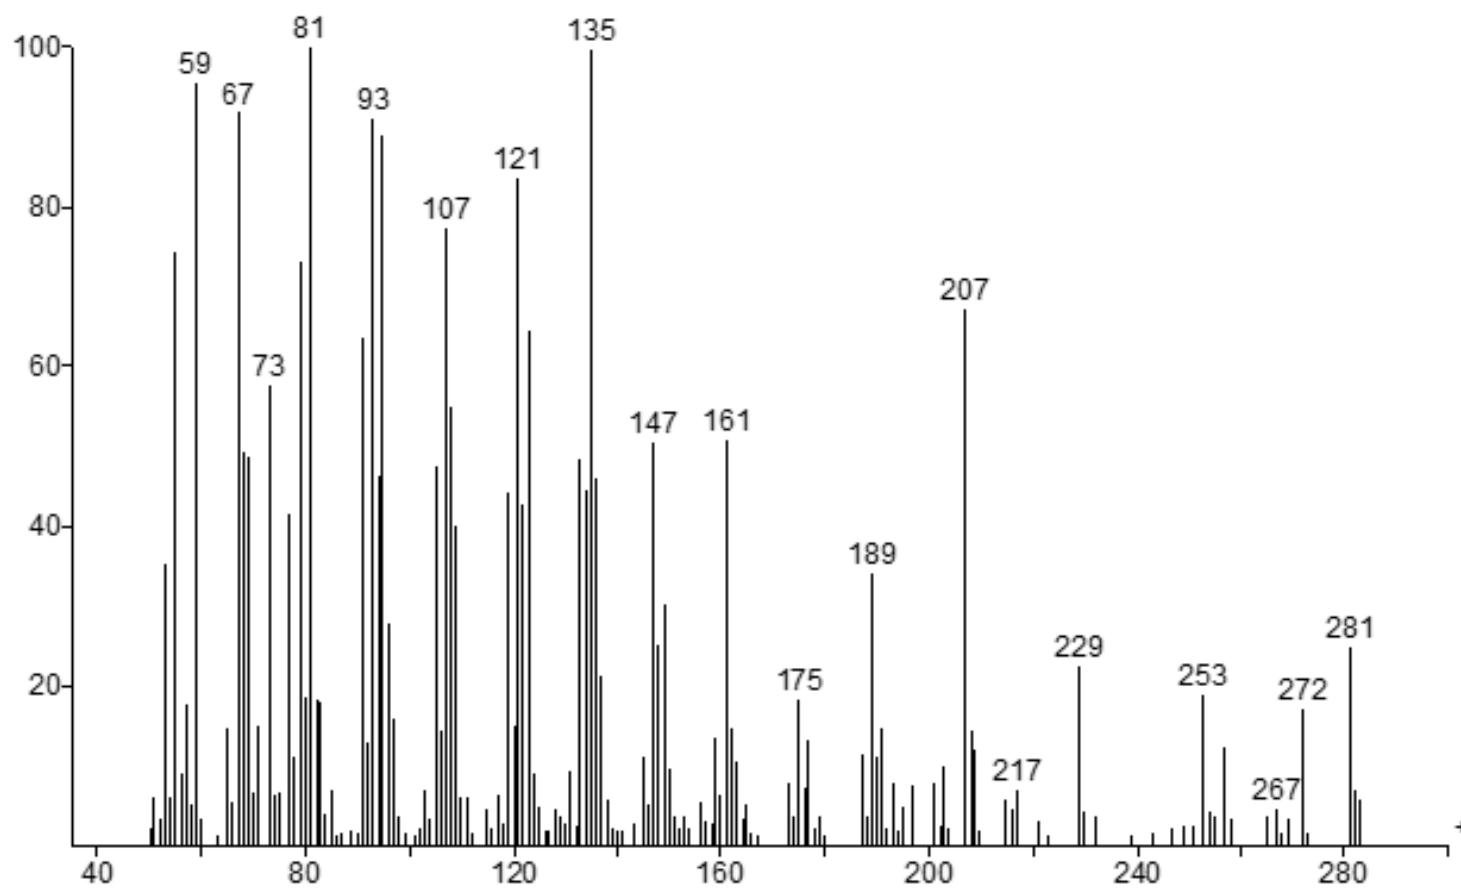

# Unknown diterpene 12

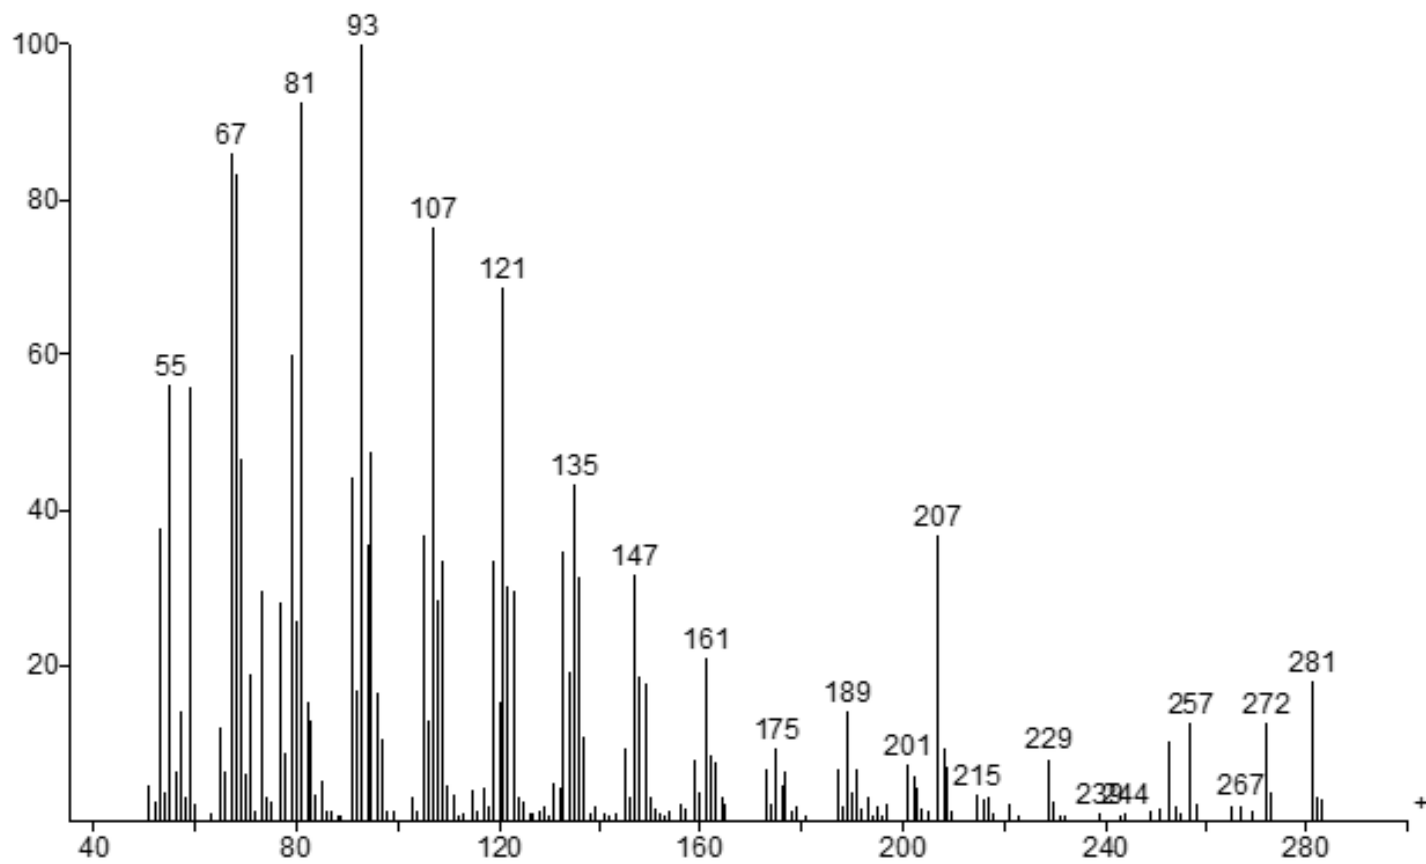



# geranylgeraniol

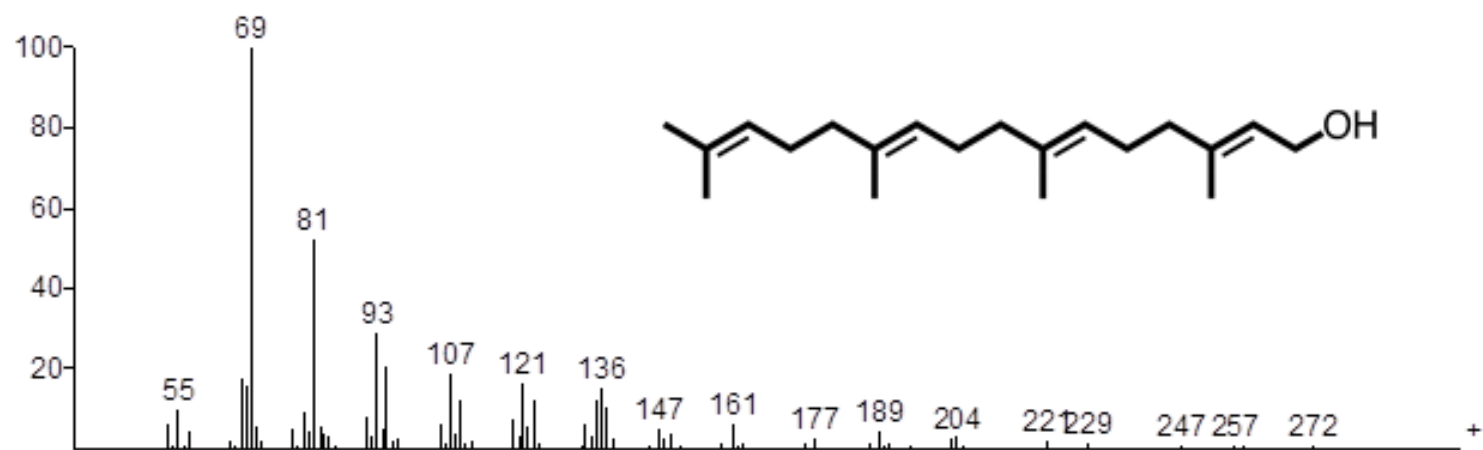

# Unknown diterpene alcohol

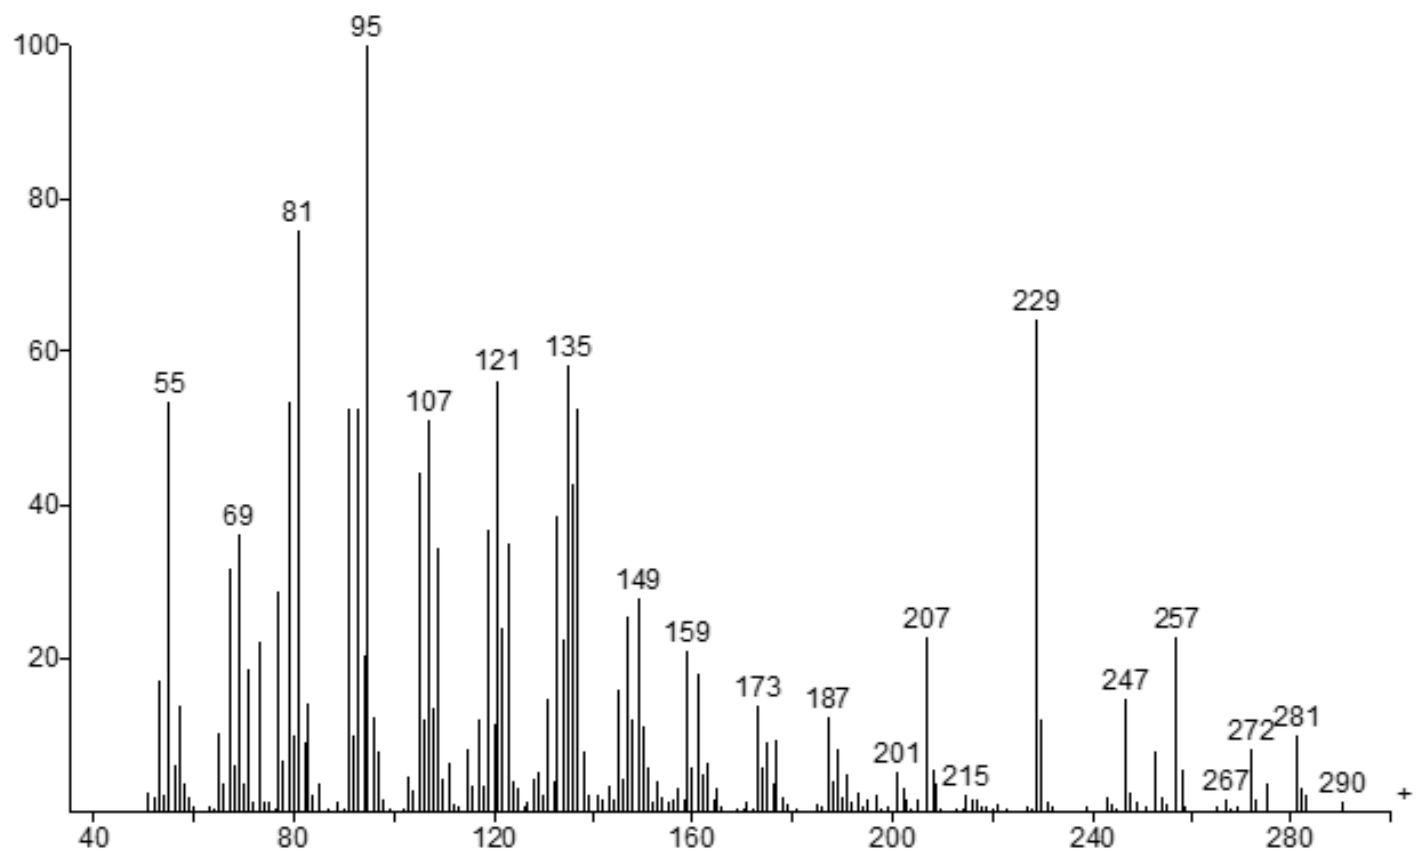

# Unknown sesterterpene 1

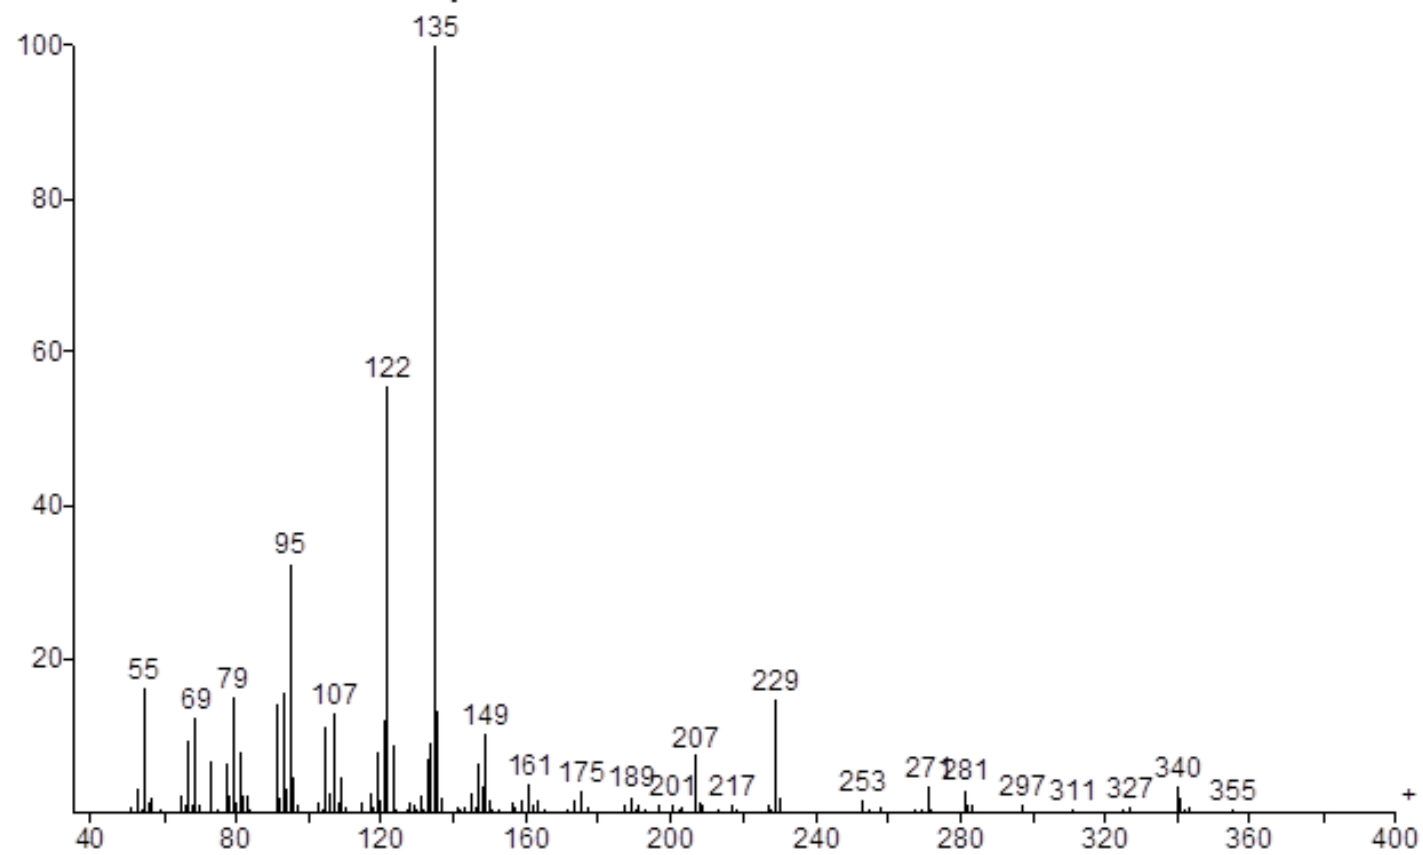

## Unknown sesterterpene 2

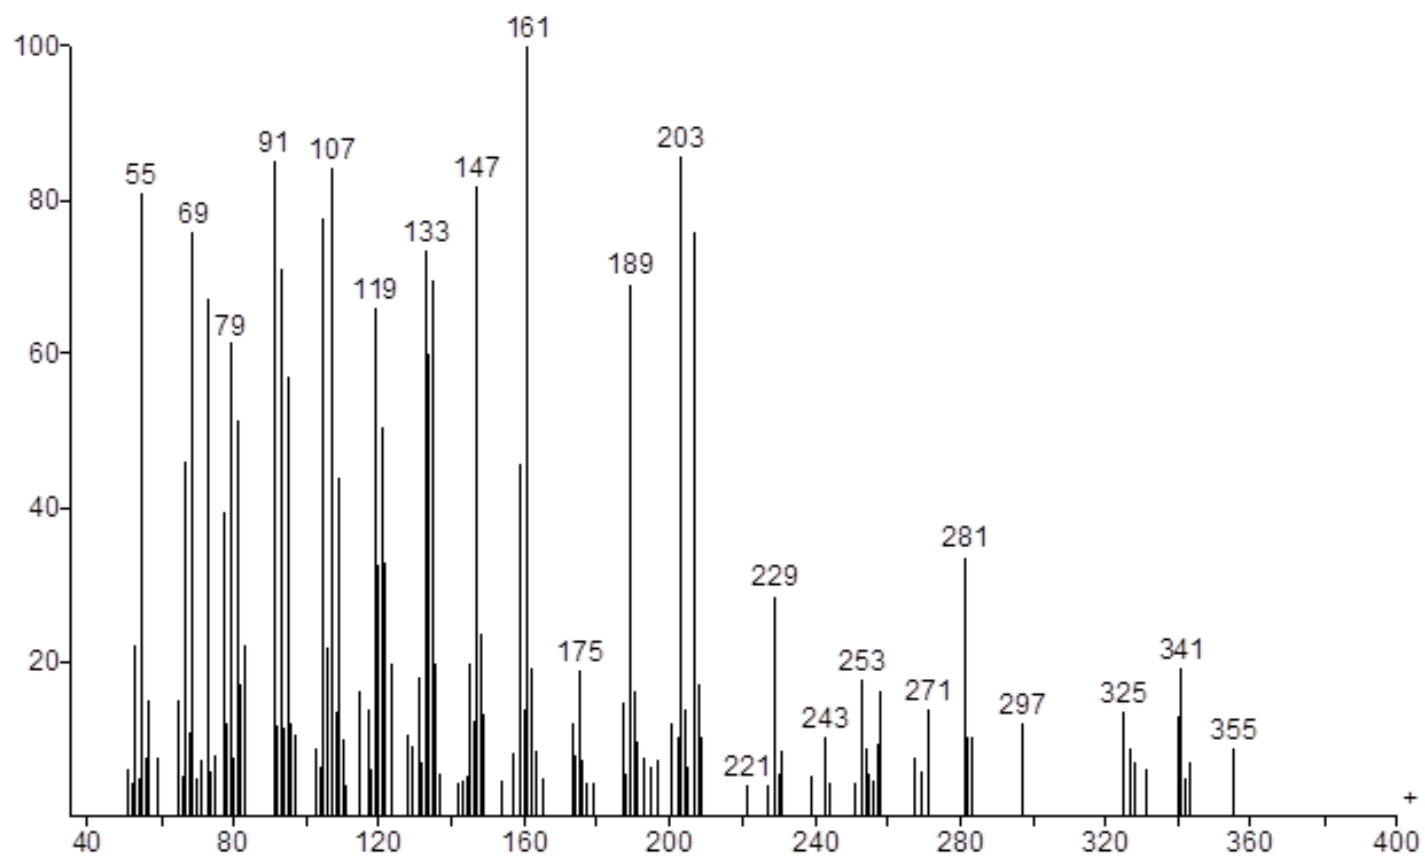

### Unknown sesterterpene 3

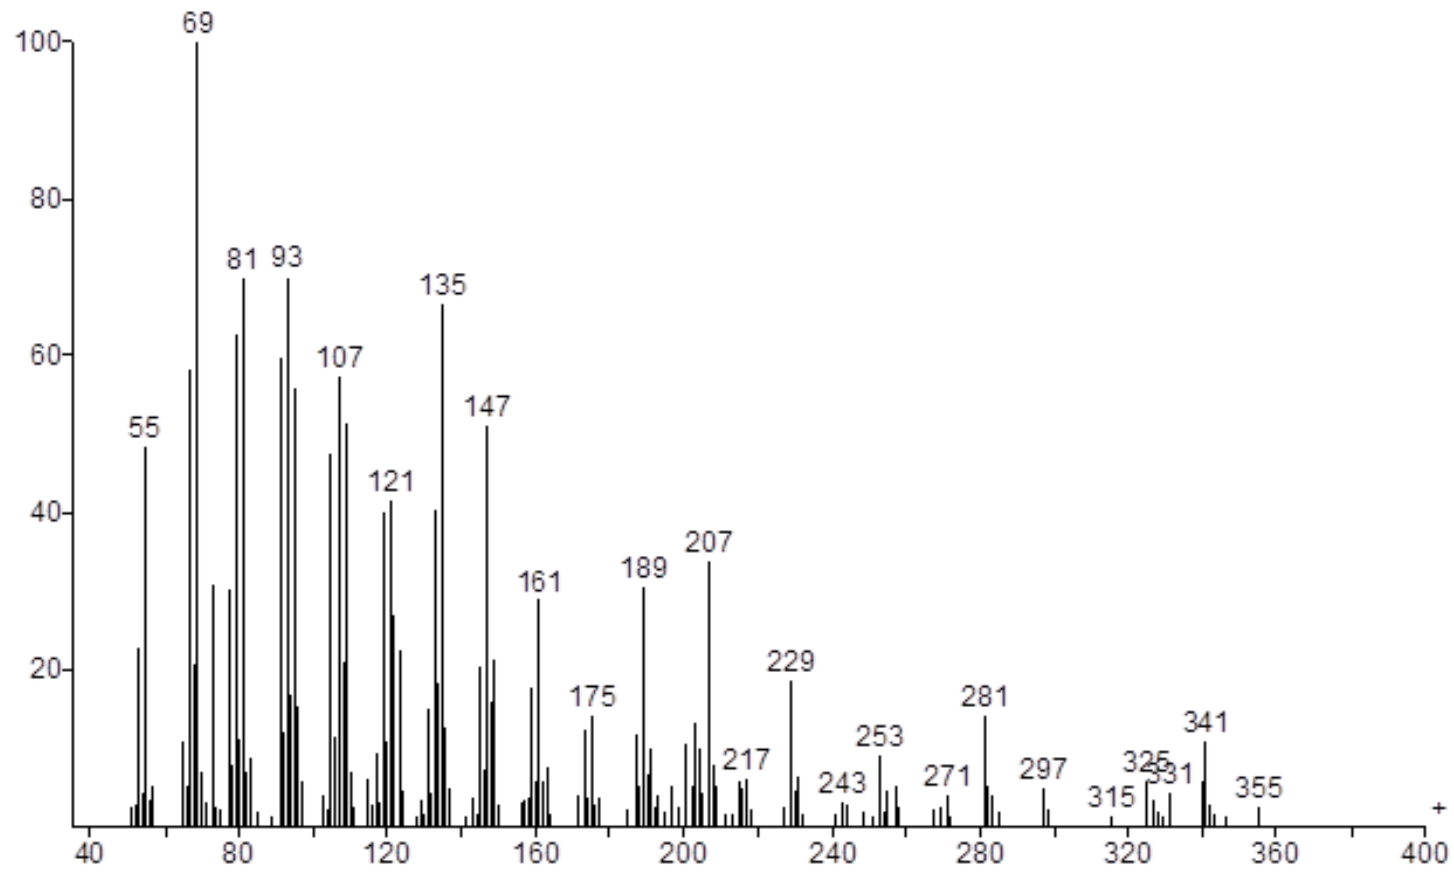

**Table S1.** Primers used for mutagenesis.

|                                    | <b>Primers</b>                                                                                                                                                                                                                                                                                                            |
|------------------------------------|---------------------------------------------------------------------------------------------------------------------------------------------------------------------------------------------------------------------------------------------------------------------------------------------------------------------------|
| TbTS $\alpha$ $\beta$              | CGGCGGCATATGGATGATATCCCTCGACTCTCCGCCAATTATCATG<br>GCGAAAGGCGTTCCAGCAGATCGATGGACCGTCTCCGAGCGCATTGAACATATC<br>GATATGTTCAATGCGCTCGGAGACGGGTGATCGATCTGCTGGAACGCCTTTTCGC<br>CCGCCGGGATCCTACTTGAATTGGATCAATATAAACTTTTCTTATATAGTCCTTAATCTCCTCATTG                                                                                |
| TbTS $\alpha$ $\beta$ <sub>G</sub> | GTCGGAGACGGGGGATCGATCGATCTGC<br>GCAGATCGATCGATCCCCCGTCTCCGAGC                                                                                                                                                                                                                                                             |
| TbTS $\alpha$ $\beta$ '            | CGGCGGCATATGGATGATATCCCTCGACTCTCCGCC<br>ATCGTCCATAGCTCTTTCGTCAGGAAATGCAAGAAATGAAGCTTCATATAGGCTTAGTAT<br>ATACTAAGCCTATATGAAGCTTCATTTCTTGCAATTCCTGACGAAAGAGCTATGGACGAT<br>CCGCCGGGATCCTACTTGAATTGGATCAATATAAAAC                                                                                                             |
| TbTS $\alpha$                      | CGGCGGCATATGGATGATATCCCTCGACTCTCCGCCAATTATCATG<br>GTCCAAATTTTGCCAATTTCTAAACATTTTGAATTAATCTCAAAGAATCTCCGTCTCCGAGCGCATTGAACAT<br>ATGTTCAATGCGCTCGGAGACGGAGATTCTTTGAGTAATTCAAATGTTTAGAATTGGCAAATTTGGAC<br>CCGCCGGGATCCTACTTGAATTGGATCAATATAAACTTTTCTTATATAGTCCTTAATCTCCTCATTG                                                |
| PaFS $\alpha$ -EvSS $\alpha$       | TACTTCCAATCCAATGCAGAGTTCAAATACTCGGAAGTCGTTG<br>GGTTTTGATACCGTTTCGCGCTCAGATCCTCTGTAGAGTCCGATTCATCTGC<br>GTACAGGACATGACTCCAAAGATGGCAGTCTTGACGCATCCATTCC<br>GGAATGGATGCGTCAAGGACTGCCATCTTTGGAGTCATGTCCTGTAC<br>GCAGATGAATCGGACTCTACAGAGGATCTGAGCGCGAACGGTATCAAAACC<br>TTATCCAATTCCAATGTTATTAGCCGTTTTTCAGCAGCTCCATAATCA       |
| PaFS $\alpha$ '-EvSS $\alpha$      | GGCAAATGCCTTGATTGCTGTGGG<br>CCCACAGCAATCAAGGCATTTGCC<br>GATTGCTGCGGGCTTGCAGAAC<br>GTTCTGCAAGCCCGCAGCAATC                                                                                                                                                                                                                  |
| AcOS $\alpha$ -PaFS $\alpha$       | TACTTCCAATCCAATGCACATATGGCGTGCAAGTATAGCACCTGATTGATAGCAGCC<br>GTCGTTTCCAGCAGGCTCGCCTGCACCAGCGCCGGAATGATC<br>GATCATTCCGGCGCTGGTGCAGGCGAGCCTGCTGAACGAC<br>CTGCCTACTTCCGCTTCCCAAGCTCTTCAGTTTCGTTCCGGCTTGCTC<br>GAGCAAGCCGAACGAAGTGAAGAGCTTGGGAAGCGGAAGTAGGCAG<br>TTATCCAATTCCAATGTTATTAGACTCGCAGAAGCTCCAGCAAAAGCCTCATGGCAGGGT |
| AcOS $\alpha$ '-PaFS $\alpha$      | TACTTCCAATCCAATGCACATATGGCGTGCAAGTATAGCACCTGATTGATAGCAGCC<br>GTCGTTTCCAGCAGGCTCACCTGCACCCACGCCGGAATGATC<br>GATCATTCCGGCGTGGGTGCAGGTGAGCCTGCTGAACGAC<br>CTGCCTACTTCCGCTTCCCAAGCTCTTCAGTTTCGTTCCGGCTTGCTC<br>GAGCAAGCCGAACGAAGTGAAGAGCTTGGGAAGCGGAAGTAGGCAG<br>TTATCCAATTCCAATGTTATTAGACTCGCAGAAGCTCCAGCAAAAGCCTCATGGCAGGGT |

### Taxadiene Synthase Cyclization Mechanism

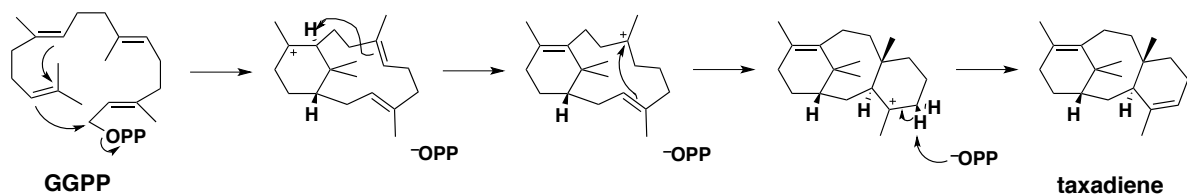

### Fusicocadiene Synthase Cyclization Mechanism

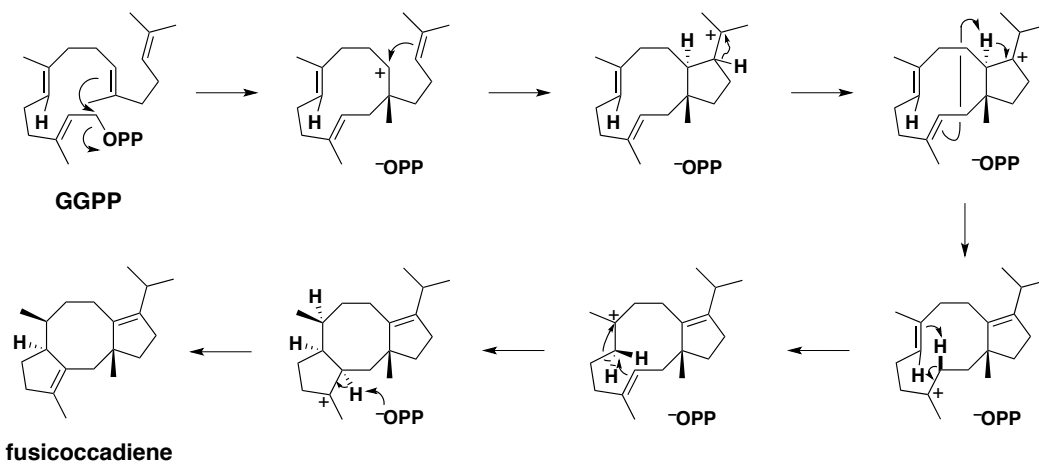

### Ophiobolin F Synthase Cyclization Mechanism

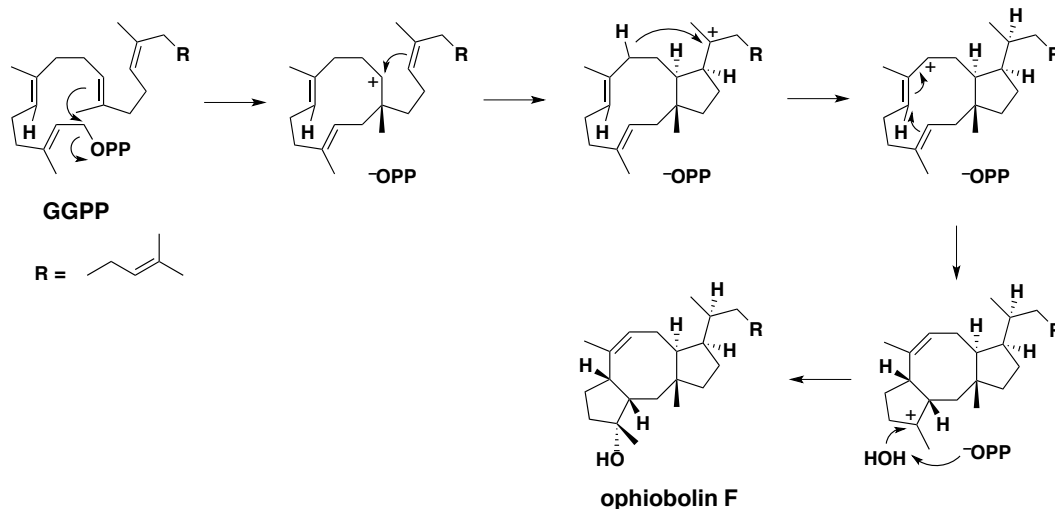

**Figure S1.** Cyclization mechanisms of taxadiene synthase, fusicocadiene synthase, and ophiobolin F synthase.
